# Supplementary material for: Diet-Induced Obesity Modulates Epigenetic Responses to Ionizing Radiation in Mice
Source: PLOS journal article supplement (doi:10.1371/journal.pone.0106277), 2014-08-29

**Figure S2**

**Heatmap of miRNA expression in the livers of obese and/or irradiated C57BL/6J DIO mice.** Unsupervised hierarchical clustering of 1157 mouse miRNAs (100% of known mouse miRNAs) was performed. *C*: control (mice No. 116, 117, 118) ; *HF*: HF diet (mice No. 106, 107, 108) ; *R*: irradiated (mice No. 111, 112, 113) ; *HFR*: HF diet, irradiated (mice No. 101, 102, 103).

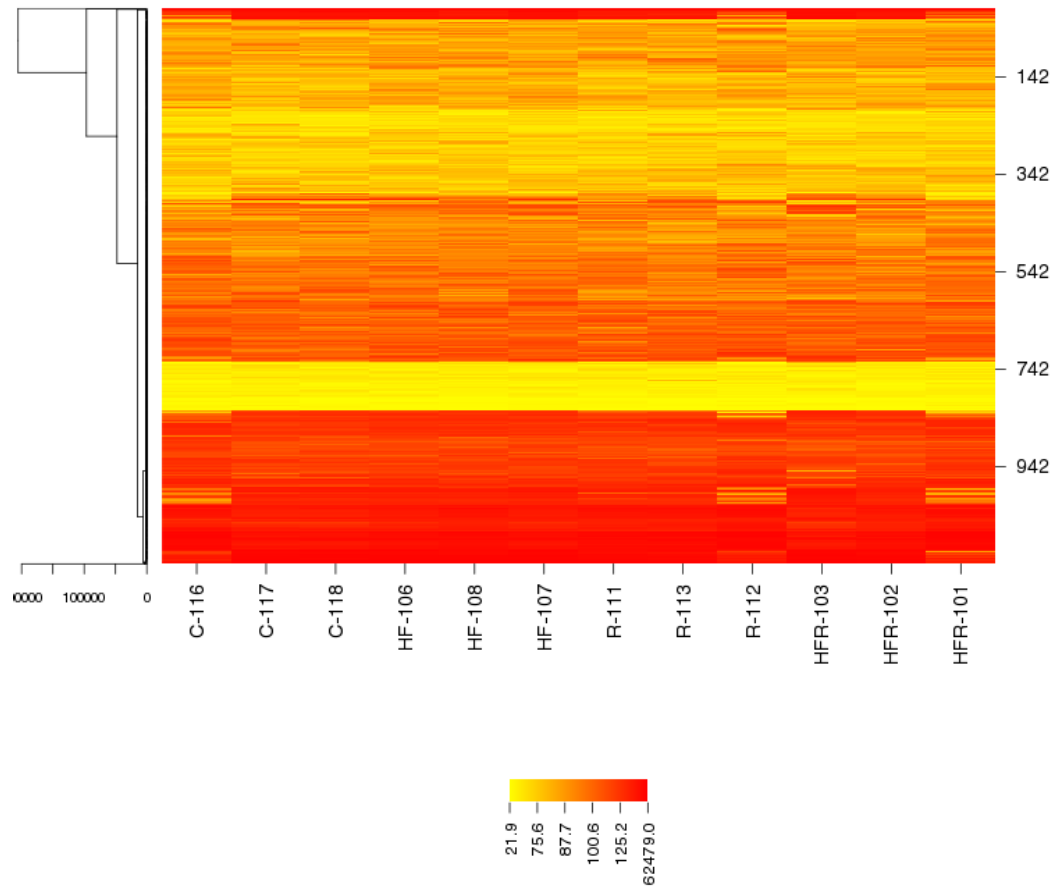

Supplement: S2 (10.1371/journal.pone.0106277.s002) [file journal.pone.0106277.s002]
